# Supplementary material for: Protein Data Bank: A Comprehensive Review of 3D Structure Holdings and Worldwide Utilization by Researchers, Educators, and Students
Source: MDPI journal article supplement (doi:10.3390/biom12101425), 2022-10-04
Supplement: s1 [file s1]

**Supplementary Table S1.** Cumulative list of external data resources identified as repackaging and redistributing PDB data (Source: *Nucleic Acids Research Molecular Biology Online Database Collection*).

|                                                             |                                                    |                                         |                                                                        |                                                                                |                                                                        |
|-------------------------------------------------------------|----------------------------------------------------|-----------------------------------------|------------------------------------------------------------------------|--------------------------------------------------------------------------------|------------------------------------------------------------------------|
| <b>1-9</b>                                                  | BIGNASim                                           | ConsensusPathDB                         | DOMMINO*                                                               | <b>G</b>                                                                       | HRaP - Database of occurrence of HomoRepeats and Patterns in proteomes |
| 16S and 23S Ribosomal RNA Mutation Database                 | Binding MOAD                                       | ConSurf-DB                              | DrLLPS                                                                 | G4LDB                                                                          |                                                                        |
| 2P2ldb*                                                     | BindingDB                                          | COSMIC                                  | Drosophila polymorphism database                                       | Gene Wiki                                                                      |                                                                        |
| 3D rRNA modification maps                                   | BioGPS                                             | CoV3D                                   | DrugCentral                                                            | Gene4Denovo                                                                    | <b>I</b>                                                               |
| 3D-Footprint*                                               | BioLiP                                             | CovInDB                                 | DrugSpaceX                                                             | GeneCards                                                                      | IBIS                                                                   |
| 3D-Interologs                                               | BioMagResBank                                      | CovPDB                                  | DSD*                                                                   | Genome3D*                                                                      | IDDB                                                                   |
| 3DID - 3D interacting domains                               | BIOZON*                                            | CPDB                                    | DSDBASE                                                                | Genomic Threading Database*                                                    | IDEAL                                                                  |
| 3DSwap: Database of Proteins involved in 3D domain Swapping | BRENDA                                             | CPPsite                                 | DualSeqDB                                                              | GermOnline                                                                     | IEDB                                                                   |
|                                                             | BSDB                                               | CryptoDB - Cryptosporidium database     | <b>E</b>                                                               | GiardiaDB.org                                                                  | IEDB-3D*                                                               |
|                                                             | BSORF - Bacillus subtilis Open Reading Frames      | CSA - Catalytic Site Atlas              | EBI Enzyme Portal                                                      | Glycan Fragment DB                                                             | IGDD*                                                                  |
| <b>A</b>                                                    | <b>C</b>                                           | CSDBase - Cold Shock Domain database    | ECMDB                                                                  | GlycomeDB                                                                      | iGNM                                                                   |
| ABCD                                                        | CADB - Conformational Angles DataBase of Proteins* | CSS - Carbohydrate Structure Suite*     | ECOD                                                                   | GlyTouCan                                                                      | IMGT/3Dstructure-DB                                                    |
| AcrHub                                                      | CAMP                                               | Cube-DB*                                | eF-site - Electrostatic surface of Functional site*                    | GPCRDB                                                                         | IMGT/mAb-DB                                                            |
| ActiveDriverDB                                              | Cancer3D                                           | Cybase                                  | EK3D                                                                   | gpDB - G-protein database                                                      | IMOTdb                                                                 |
| ADPriboDB                                                   | CancerPPD                                          | <b>D</b>                                | ELM - Eukaryotic Linear Motif: functional sites in eukaryotic proteins | GproteinDb                                                                     | INDI                                                                   |
| AffinDB*                                                    | CancerPPD                                          | Dali database*                          | EMDDataBank                                                            | GTOP - Genomes To Protein structures                                           | Influenza Research Database                                            |
| Aging Atlas                                                 | CancerResource*                                    | DAnCER*                                 | Ensembl                                                                | GWIDD                                                                          | InnateDB                                                               |
| AHTPdb                                                      | CanSAR                                             | DARC*                                   | Enzyme Nomenclature                                                    | GyDB                                                                           | IntEnz                                                                 |
| Allosteric Database                                         | CAPS-DB                                            | DATF                                    | Epitome                                                                | <b>H</b>                                                                       | Inter-Chain Beta-Sheets*                                               |
| AlphaFold Protein Structure Database                        | Carbohydrate Structure Database (CSDB)*            | DBAASP                                  | eProS*                                                                 | H-Invitational Database, an integrated database of human genes and transcripts | InterEvol                                                              |
| AmoebaDB                                                    | CARD                                               | DBAli*                                  | euHCVdb                                                                | HCAD - Human Chromosome Aberration Database*                                   | InterRNA                                                               |
| AmyPro                                                      | CarpeDB                                            | DBD                                     | Europe PubMed Central                                                  | HCV Database                                                                   | iProClass                                                              |
| anti-CRISPRdb                                               | CATH                                               | dbPTM                                   | European Nucleotide Archive                                            | Heme Protein Database                                                          | IUBMB Nomenclature database                                            |
| APD - Antimicrobial Peptide Database                        | CAZy                                               | dbRIP                                   | EVEREST - EVolutionary Ensembles of REcurrent SegmenTs*                | Hemolytik                                                                      | IVDB - Influenza Virus Database*                                       |
| ApiDB - Apicomplexan DataBase                               | CC+                                                | dbSNO*                                  | ExplorEnz                                                              | Het-PDB Navi                                                                   | <b>J</b>                                                               |
| ApoHoloDB                                                   | ccPDB                                              | DDBJ                                    | Exposome-Explorer                                                      | HIC-Up*                                                                        | JAIL*                                                                  |
| APPRIS                                                      | CDD                                                | Death Domain database                   | EyeSite*                                                               | HIV RT and Protease Sequence Database                                          | JASPAR                                                                 |
| ArachnoServer*                                              | CFGP                                               | Decoys-R-Us*                            | EzCatDB                                                                | HMDB - The Human Metabolome Database                                           | Jenalib: Jena Library of Biological Macromolecules                     |
| ArchDB                                                      | CGD - Candida Genome Database                      | Defensins Knowledgebase                 | <b>F</b>                                                               | HMPD*                                                                          | JET2 Viewer                                                            |
| AS-ALPS                                                     | ChannelsDB                                         | Degradome Database                      | Factorbook                                                             | HOMSTRAD - Homologous Structure Alignment Database                             | <b>K</b>                                                               |
| ASPD                                                        | ChEBI - Chemical Entities of Biological Interest   | DEPOD                                   | FAIRDOMHub                                                             | Hoppsigen                                                                      | KBDOCK*                                                                |
| AspGD*                                                      | ChemBank                                           | DIGGER                                  | FANTOM                                                                 | HotRegion*                                                                     | KIDFamMap                                                              |
| ASPicDB                                                     | ChEMBL                                             | DIMA                                    | FireDB                                                                 | HotSprint*                                                                     | KinaseMD                                                               |
| ATGC*                                                       | ChlamDB                                            | DisProt - Database of Protein Disorder  | FireProtDB                                                             | HPID - Human Protein Interaction database                                      | Kincore                                                                |
| Autophagy Database                                          | CIPRO                                              | DockCoV2                                | FlyMine                                                                | HPRD - Human Protein Reference Database                                        | KLIFs                                                                  |
| AutoPSI*                                                    | CMGSDB                                             | Dockground                              | FragmentStore*                                                         |                                                                                | KnotProt                                                               |
| <b>B</b>                                                    | CMNPD                                              | DomIns - Database of Domain Insertions* | FungiDB                                                                |                                                                                | Knottin database                                                       |
| BACTIBASE                                                   | COMBEX*                                            |                                         | FuzDB                                                                  |                                                                                | <b>L</b>                                                               |
| BAlIbase                                                    | COME - Co-Ordination of Metals etc.*               |                                         |                                                                        |                                                                                | Laminin Database                                                       |
| BastionHub                                                  | ComSin*                                            |                                         |                                                                        |                                                                                | LenVarDB                                                               |
| BCIpep                                                      | ConoServer                                         |                                         |                                                                        |                                                                                | LigAsite*                                                              |
| Benchmark*                                                  |                                                    |                                         |                                                                        |                                                                                | LinkProt                                                               |
| BiGG Models                                                 |                                                    |                                         |                                                                        |                                                                                | Lipase Engineering Database                                            |

**Supplementary Table S1, cont.**

|                                                 |                                                                      |                                    |                                              |                                                                       |                                                                            |
|-------------------------------------------------|----------------------------------------------------------------------|------------------------------------|----------------------------------------------|-----------------------------------------------------------------------|----------------------------------------------------------------------------|
| LitCovid                                        | BioProject                                                           | PEDANT*                            | PSCDB                                        | SMART                                                                 | The Complex Portal                                                         |
| LOCATE*                                         | NCBI BioSystems*                                                     | Peptaibol                          | Pseudomonas Genome Database                  | SMoS.2: Update of database of Structural Motifs in Superfamilies      | ThermoMutDB                                                                |
| LOX-DB                                          | NCBI Protein database                                                | Pfam                               | PTGL                                         | SNAPPI                                                                | ThYme                                                                      |
| <b>M</b>                                        | NDB                                                                  | PharmGKB                           | PubChem                                      | SNPeffect                                                             | tmRDB                                                                      |
| MACiE                                           | Negatome                                                             | Pharos                             | PylgClassify                                 | SoyKB - Soybean Knowledge Base                                        | TopDB                                                                      |
| MALISAM                                         | NetworkKIN                                                           | PhaSepPro *                        | <b>R</b>                                     | Spliceosome Database                                                  | TopoSNP                                                                    |
| markerDB                                        | neXtProt                                                             | PhosphoSitePlus                    | R.E.DD.B.                                    | SPROUTS*                                                              | ToxoDB - The Toxoplasma gondii Genome Database                             |
| MatrixDB                                        | NLSdb                                                                | PhyTAMP                            | RAID*                                        | SRPDB*                                                                | Transformer*                                                               |
| MegaMotifbase                                   | NMPdb - Nuclear matrix associated proteins database                  | PIR - Protein Information Resource | RAPID                                        | SSToSS - Sequence-Structural Templates of Single-member Superfamilies | TriTrypDB                                                                  |
| Membranome                                      | NP-MRD                                                               | piSite                             | RCSB Protein Data Bank                       | STAP refinement of NMRdb*                                             | TSTMP                                                                      |
| MemMoRF                                         | NONCODE                                                              | Plant Reactome                     | Reactome                                     | Start2Fold                                                            | Tumor Associated Gene database                                             |
| MeMotif*                                        | NORINE                                                               | PlantTFDB                          | RegulonDB now RegulonDB v 10.5               | STCRDab                                                               | <b>U</b>                                                                   |
| MEROPS                                          | NP-IDB (Nucleic acids & Protein Interaction DataBase)                | Platinum*                          | REPAIRtoire                                  | STINGreport                                                           | UCSC Genome Browser                                                        |
| MetaBioME*                                      | NURSA                                                                | PLPMDB*                            | RepeatsDB                                    | STRING                                                                | UCSD-Nature Signaling Gateway Molecule Pages*                              |
| MetaCyc                                         | <b>O</b>                                                             | PMDb - Protein Model Database*     | Rfam                                         | Structure Superposition Database                                      | Uniclust                                                                   |
| MetalPDB                                        | O-GLYCBASE                                                           | PncsHub                            | Ribonuclease P Database*                     | SubtiWiki                                                             | UniProt                                                                    |
| metaTIGER                                       | OMPdb*                                                               | Pocketome*                         | RNA Bricks                                   | SugarBindDB                                                           | <b>V</b>                                                                   |
| MHCBN                                           | ONQUADRO                                                             | Polbase*                           | RNA CoSSMos*                                 | SuperCYP*                                                             | ValidatorDB                                                                |
| MicrobesOnline                                  | OnTheFly                                                             | PortEco                            | RNA FRABASE                                  | SuperDrug*                                                            | ValidNESS*                                                                 |
| MicrosporidiaDB                                 | Ontobee                                                              | PoSSuM                             | RNA SSTRAND                                  | SuperPain*                                                            | VDJdb                                                                      |
| MimoDB                                          | Open Targets                                                         | PPD                                | RNAcentral                                   | SuperSweet*                                                           | VectorBase                                                                 |
| MINAS                                           | OPM                                                                  | PPT-DB                             | RNAjunction                                  | SuperTarget*                                                          | VEuPathDB                                                                  |
| MIPModDB                                        | ORENZA*                                                              | prePPI                             | RNApathwaysDB*                               | SuperToxic*                                                           | VIDA*                                                                      |
| MitoProteome                                    | <b>P</b>                                                             | PREX                               | RNAArchitecture                              | SWEET-DB                                                              | VIOLIN                                                                     |
| MMCD                                            | P3DB                                                                 | PRIDE                              | RsiteDB                                      | SWISS-2DPAGE                                                          | VIPERdb                                                                    |
| MMDB*                                           | PAMDB                                                                | proChIPdb                          | <b>S</b>                                     | SWISS-MODEL Repository                                                | ViPR                                                                       |
| MMsINC                                          | Papillomavirus Episteme                                              | ProDom*                            | SAbDab                                       | SYNBIP                                                                | VirusSurf                                                                  |
| MobiDB                                          | PASS2                                                                | ProGlycProt                        | SASBDB                                       | SynSysNet*                                                            | Voronia*                                                                   |
| ModBase                                         | Pathguide                                                            | PROMISCUOUS*                       | SATPdb                                       | SZGR                                                                  | Voronia4RNA*                                                               |
| MODOMICS                                        | PATRIC, the bacterial bioinformatics database and analysis resource* | ProNAB                             | sc-PDB                                       | <b>T</b>                                                              | <b>W</b>                                                                   |
| MoKCa                                           | PDB facilities*                                                      | ProSAS*                            | SchistoDB*                                   | T-psi-C                                                               | WDSPdb*                                                                    |
| MolMovDB - Database of Macromolecular Movements | PDB_TM                                                               | PROSITE                            | SCO2 - Structural Classification Of Proteins | T3DB                                                                  | WholeCellKB - Model Organism Databases for Comprehensive Whole-Cell Models |
| MoonProt                                        | PDBe                                                                 | PROTAC-DB                          | SCOpe                                        | TAED - The Adaptive Evolution Database                                | WITHDRAWN*                                                                 |
| Mouse Genome Database (MGD)                     | PDBj                                                                 | ProtChemSI                         | SCOPPI                                       | Target-Pathogen                                                       | Wnt Database                                                               |
| MP:PD*                                          | PDBsum                                                               | Protegen*                          | SCoV2-MD                                     | TCDB                                                                  | <b>Y</b>                                                                   |
| MPDB - Molecular Probe Database                 | pE-DB*                                                               | Protein kinase resource*           | SDAP                                         | Telomerase database                                                   | Yeast Resource Center                                                      |
| MuIPSSM                                         |                                                                      | Protein-protein interfaces         | SecRet4                                      | TFClass                                                               |                                                                            |
| MultiTaskDB                                     |                                                                      | Proteome-pl                        | SFLD                                         |                                                                       |                                                                            |
| MutDB*                                          |                                                                      | ProteomeScout                      | SGD - Saccharomyces Genome Database          |                                                                       |                                                                            |
| mutLBSgeneDB                                    |                                                                      | ProTeus*                           | SIFTS                                        |                                                                       |                                                                            |
| <b>N</b>                                        |                                                                      | ProTherm                           | SISYPHUS*                                    |                                                                       |                                                                            |
| Nanobase.org                                    |                                                                      | ProtoNet*                          | SitEx*                                       |                                                                       |                                                                            |
| NBDB                                            |                                                                      | ProtozoaDB*                        |                                              |                                                                       |                                                                            |
| NCBI BioSample/                                 |                                                                      |                                    |                                              |                                                                       |                                                                            |

\*Databases that have ceased operations as of August 15, 2022.
